# Supplementary material for: Three-dimensional N-doped carbon electrodes activate peroxymonosulfate for tetracycline degradation
Source: Royal Society of Chemistry journal article supplement (doi:10.1039/d3nj04311h), 2023-11-22
Supplement: d3nj04311h1.pdf [file d3nj04311h1.pdf]

**N-doped carbon (CPANI/CF) Three-dimensional electrode from polyaniline precursor for electrochemical oxidative activation of peroxymonosulfate to degrade tetracycline.**

Jieyu Zhao<sup>a,b</sup> and Yonggang Zhang<sup>\*a,b</sup>

a. State Key Laboratory of Separation Membranes and Membrane Processes, Tiangong University, Tianjin 300387, China.

b. School of Environmental Science and Engineering, Tiangong University, Tianjin 300387, China

\*Corresponding author.

E-mail addresses: zhangyonggang1895@163.com (Yonggang Zhang)

*New Journal of Chemistry*

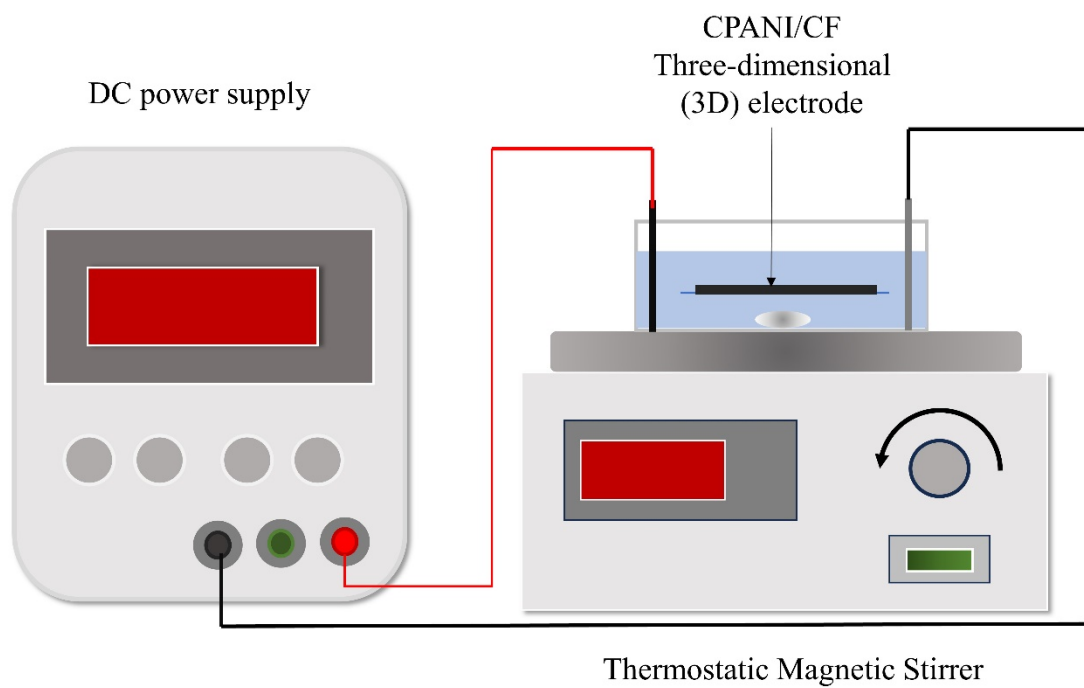

Fig.S1. Schematic of the reactor design.
